# Supplementary material
Source: publisher site journal article supplement (https://www.dovepress.com/article/282818)
Supplement: Supplementary file 1 [file get_supplementary_file.php]

Figure S1

A

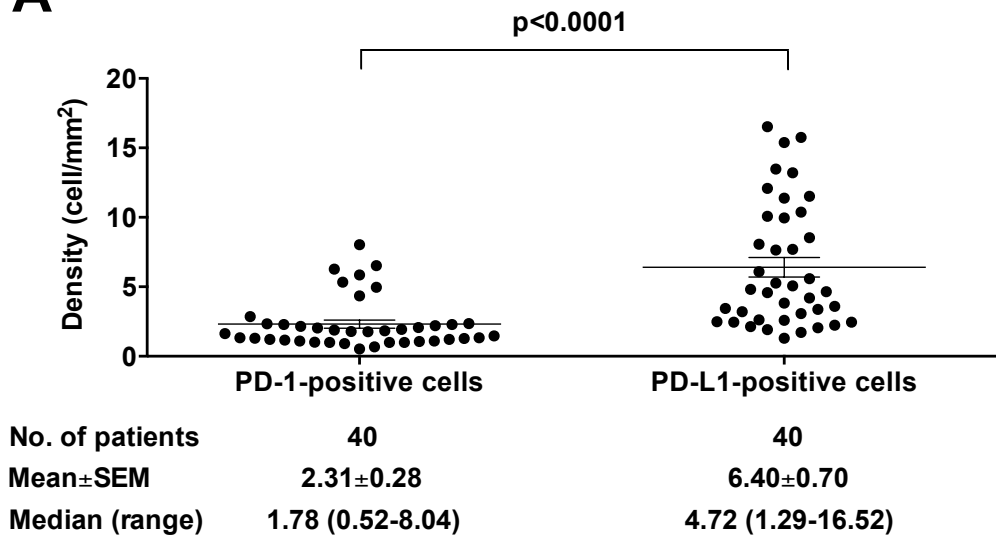

B

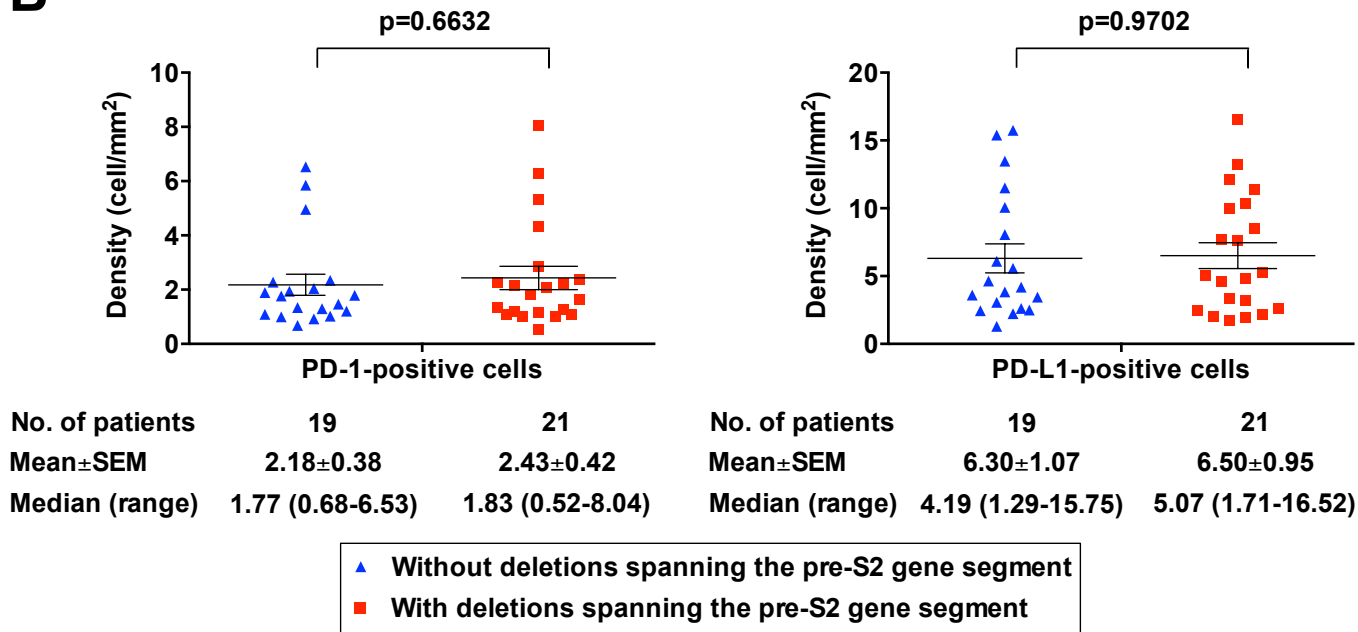

C

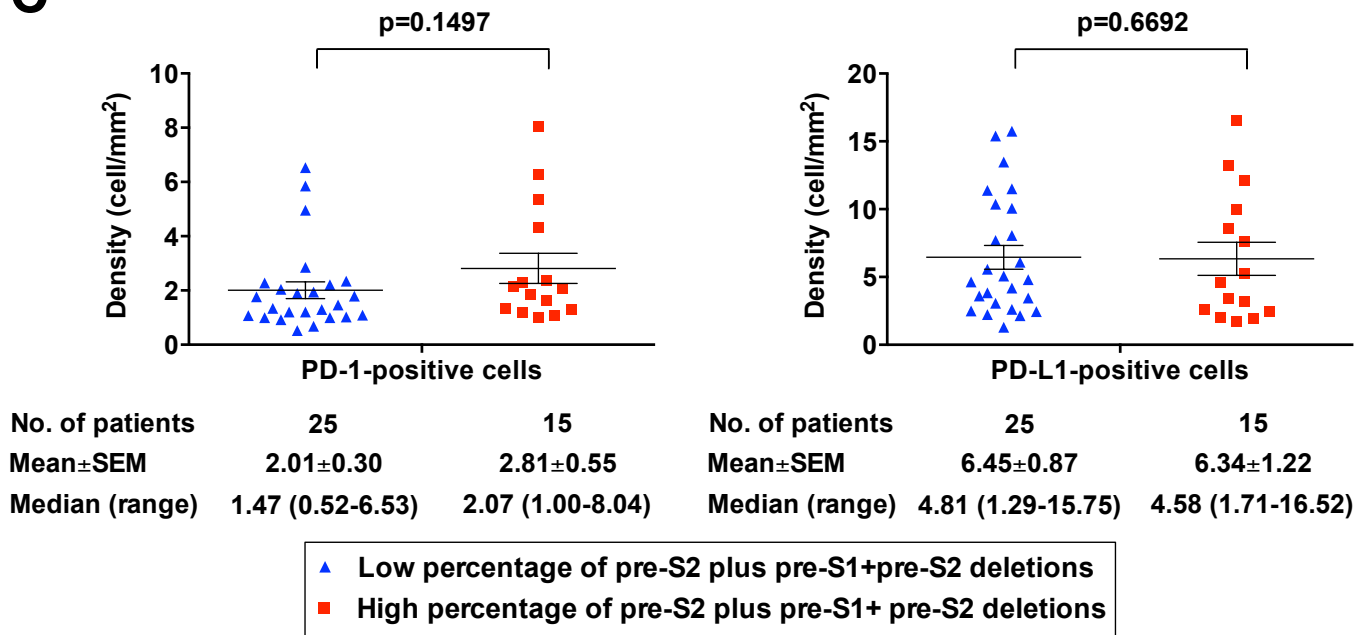

**Figure S2**

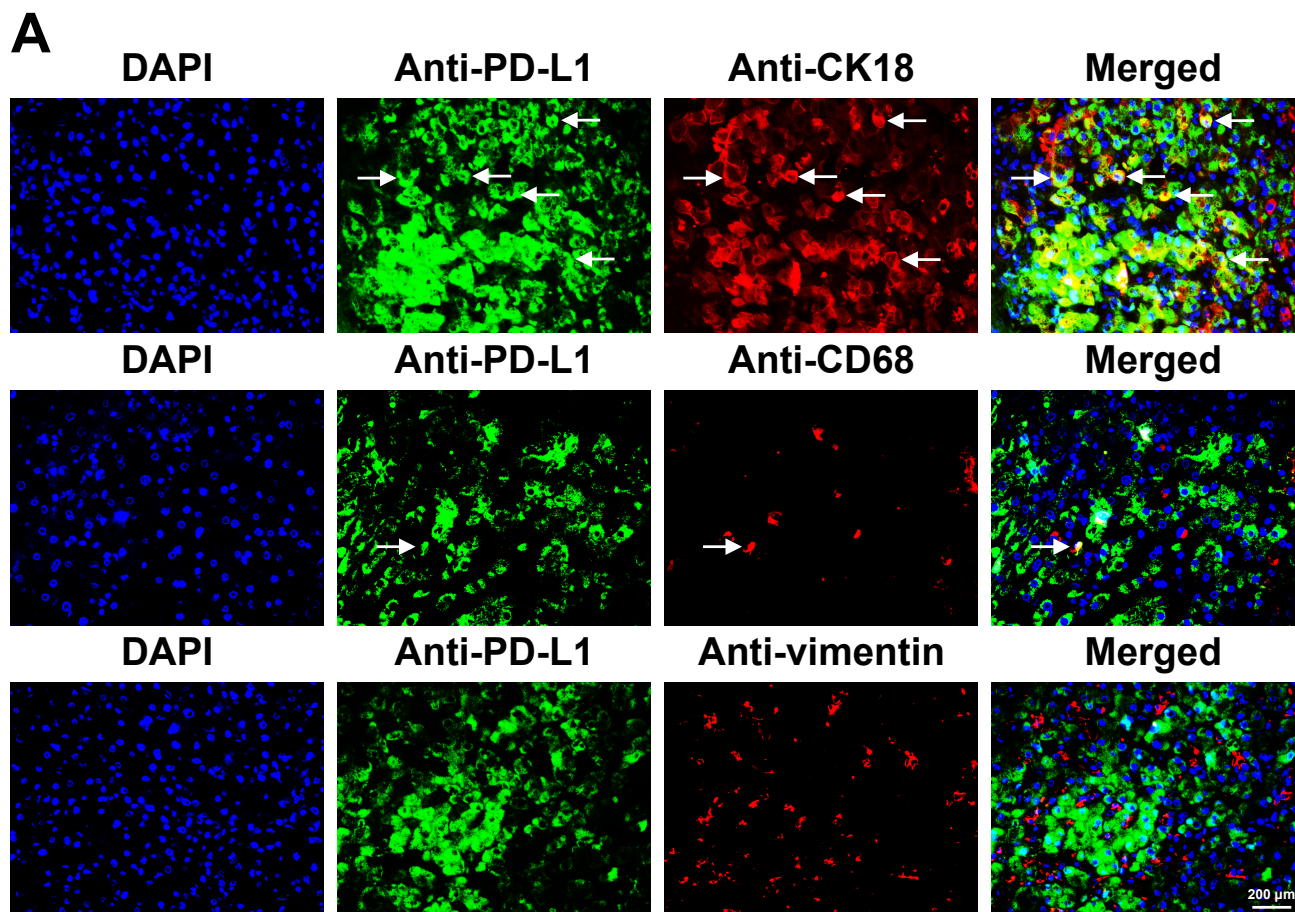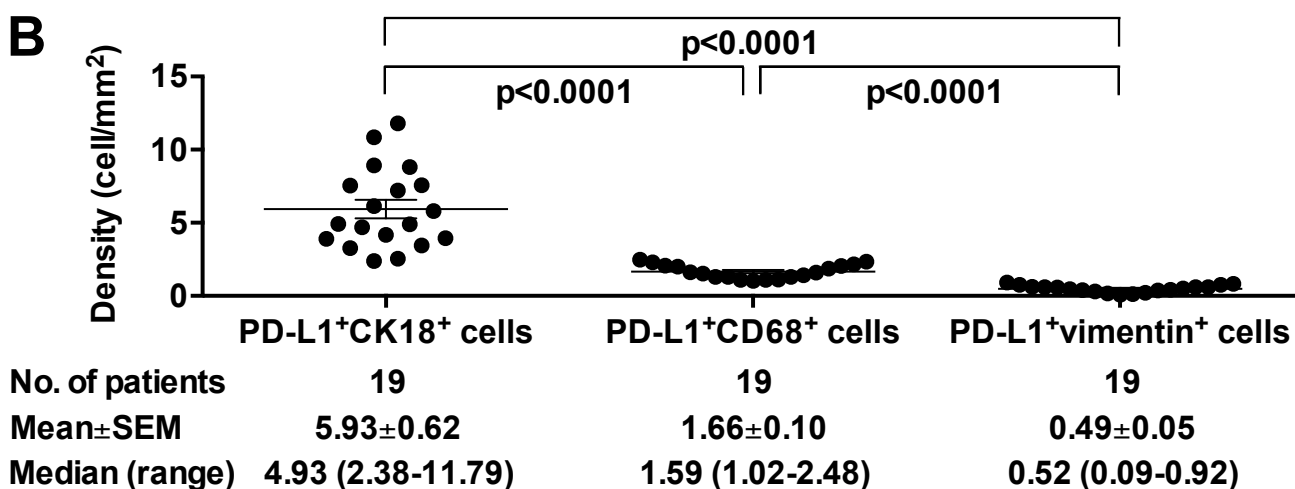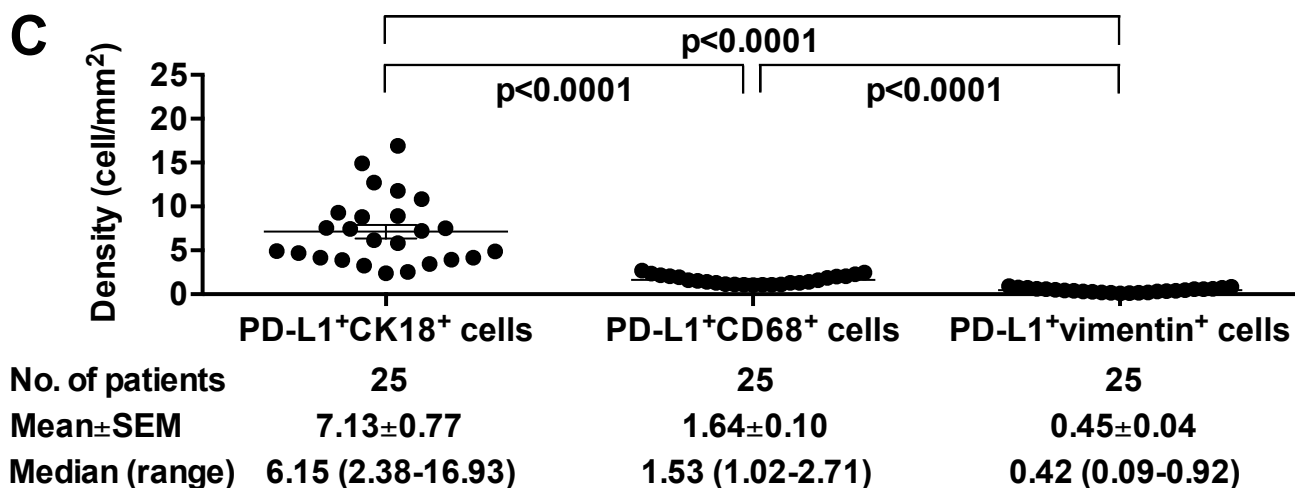

## **Supplementary Figure Legends**

### **Figure S1. Comparative analysis of the density of PD-1/PD-L1-positive cells in non-HCC tissues between the pre-S2 mutant-positive and -negative patients. (A)**

Density of PD-1- and PD-L1-positive cells in non-HCC tissues in total patients. (B)

Density of PD-1-positive cells (left graph) and PD-L1-positive cells (right graph) in

non-HCC tissues between patients with and without deletion spanning pre-S2 gene

segment. (C) Density of PD-1-positive cells (left graph) and PD-L1-positive cells

(right graph) in non-HCC tissues between patients with high and low percentage of

pre-S2 plus pre-S1+pre-S2 deletion. Horizontal lines represented the mean values of

the distribution. A P value  $< 0.05$  was considered to indicate statistical significance.

### **Figure S2. Expression profiles of PD-L1 in different cell populations in HCC**

**tissues of pre-S2 mutant-negative/low patients. (A)** The expression of PD-L1 on

tumor cells, Kupffer cells, and LSECs in HCC tissues of pre-S2 mutant-negative/low

patients was detected by fluorescent IHC staining of PD-L1 (green in color) together

with CK18 (red in color), CD68 (red in color), and vimentin (red in color),

respectively. The HCC tumor cells and Kupffer cells with PD-L1 expression appeared

yellow and were indicated by white arrows in the single-color and merged images.

Nuclei were counterstained with DAPI (blue in color). Shown were representative results. Original magnification,  $\times 40$ . Scale bar, 200  $\mu\text{m}$ . (B) Density of PD-L1/CK18 double-positive (PD-L1<sup>+</sup>CK18<sup>+</sup>), PD-L1/CD68 double-positive (PD-L1<sup>+</sup>CD68<sup>+</sup>), and PD-L1/vimentin double-positive (PD-L1<sup>+</sup>vimentin<sup>+</sup>) cells in HCC tissues of patients without deletion spanning pre-S2 gene segment. (C) Density of PD-L1<sup>+</sup>CK18<sup>+</sup>, PD-L1<sup>+</sup>CD68<sup>+</sup>, and PD-L1<sup>+</sup>vimentin<sup>+</sup> cells in HCC tissues of patients with low percentage of pre-S2 plus pre-S1+pre-S2 deletion. Horizontal lines represented the mean values of the distribution. A P value  $< 0.05$  was considered to indicate statistical significance.



**Table S1. List of the pre-S genotyping result by NGS-based analysis in 40 HBV-related HCC patients**

| Patient No. | Total reads | Pre-S deletion type (%) <sup>a</sup>                                                                                       | Deletions spanning the pre-S2 gene segment | Percentage of pre-S2 plus pre-S1+pre-S2 deletions <sup>c</sup> |
|-------------|-------------|----------------------------------------------------------------------------------------------------------------------------|--------------------------------------------|----------------------------------------------------------------|
| 1           | 346,100     | 1. <b>wild-type (99.278)<sup>b</sup></b><br>2. pre-S1 del (0.660)<br>3. pre-S2 del (0.053)<br>4. pre-S1+pre-S2 del (0.009) | negative                                   | low                                                            |
| 2           | 333,826     | 1. <b>wild-type (96.592)</b><br>2. pre-S1 del (2.906)<br>3. pre-S2 del (0.469)<br>4. pre-S1+pre-S2 del (0.033)             | negative                                   | low                                                            |
| 3           | 327,640     | 1. <b>wild-type (99.000)</b><br>2. pre-S1 del (0.927)<br>3. pre-S2 del (0.062)<br>4. pre-S1+pre-S2 del (0.012)             | negative                                   | low                                                            |
| 4           | 343,499     | 1. <b>wild-type (97.851)</b><br>2. pre-S1 del (2.037)<br>3. pre-S2 del (0.108)<br>4. pre-S1+pre-S2 del (0.005)             | negative                                   | low                                                            |
| 5           | 332,222     | 1. <b>wild-type (98.964)</b><br>2. pre-S1 del (0.943)<br>3. pre-S2 del (0.084)<br>4. pre-S1+pre-S2 del (0.009)             | negative                                   | low                                                            |

**Table S1. List of the pre-S genotyping result by NGS-based analysis in 40 HBV-related HCC patients (continued)**

| Patient No. | Total reads | Pre-S deletion type (%) <sup>a</sup>                                                                           | Deletions spanning the pre-S2 gene segment | Percentage of pre-S2 plus pre-S1+pre-S2 deletions <sup>c</sup> |
|-------------|-------------|----------------------------------------------------------------------------------------------------------------|--------------------------------------------|----------------------------------------------------------------|
| 6           | 342,663     | 1. <b>wild-type (97.781)</b><br>2. pre-S1 del (2.099)<br>3. pre-S2 del (0.112)<br>4. pre-S1+pre-S2 del (0.008) | negative                                   | low                                                            |
| 7           | 341,941     | 1. <b>wild-type (96.830)</b><br>2. pre-S1 del (1.728)<br>3. pre-S2 del (1.341)<br>4. pre-S1+pre-S2 del (0.102) | negative                                   | low                                                            |
| 8           | 324,302     | 1. <b>wild-type (98.571)</b><br>2. pre-S1 del (1.173)<br>3. pre-S2 del (0.178)<br>4. pre-S1+pre-S2 del (0.078) | negative                                   | low                                                            |
| 9           | 323,225     | 1. <b>wild-type (96.915)</b><br>2. pre-S1 del (2.701)<br>3. pre-S2 del (0.364)<br>4. pre-S1+pre-S2 del (0.020) | negative                                   | low                                                            |
| 10          | 325,092     | 1. <b>wild-type (98.069)</b><br>2. pre-S1 del (1.263)<br>3. pre-S2 del (0.609)<br>4. pre-S1+pre-S2 del (0.059) | negative                                   | low                                                            |

**Table S1. List of the pre-S genotyping result by NGS-based analysis in 40 HBV-related HCC patients (continued)**

| Patient No. | Total reads | Pre-S deletion type (%) <sup>a</sup>                                                                                   | Deletions spanning the pre-S2 gene segment | Percentage of pre-S2 plus pre-S1+pre-S2 deletions <sup>c</sup> |
|-------------|-------------|------------------------------------------------------------------------------------------------------------------------|--------------------------------------------|----------------------------------------------------------------|
| 11          | 353,564     | 1. <b>pre-S1 del (92.118)</b><br>2. <b>wild-type (7.278)</b><br>3. pre-S2 del (0.372)<br>4. pre-S1+pre-S2 del (0.231)  | negative                                   | low                                                            |
| 12          | 322,716     | 1. <b>pre-S1 del (75.241)</b><br>2. <b>wild-type (22.338)</b><br>3. pre-S2 del (1.891)<br>4. pre-S1+pre-S2 del (0.530) | negative                                   | low                                                            |
| 13          | 336,064     | 1. <b>wild-type (71.590)</b><br>2. <b>pre-S1 del (28.270)</b><br>3. pre-S2 del (0.129)<br>4. pre-S1+pre-S2 del (0.011) | negative                                   | low                                                            |
| 14          | 325,894     | 1. <b>pre-S1 del (75.109)</b><br>2. <b>wild-type (23.879)</b><br>3. pre-S1+pre-S2 del (0.687)<br>4. pre-S2 del (0.325) | negative                                   | low                                                            |
| 15          | 365,835     | 1. <b>pre-S1 del (86.404)</b><br>2. <b>wild-type (12.695)</b><br>3. pre-S2 del (0.737)<br>4. pre-S1+pre-S2 del (0.163) | negative                                   | low                                                            |

**Table S1. List of the pre-S genotyping result by NGS-based analysis in 40 HBV-related HCC patients (continued)**

| Patient No. | Total reads | Pre-S deletion type (%) <sup>a</sup>                                                                                   | Deletions spanning the pre-S2 gene segment | Percentage of pre-S2 plus pre-S1+pre-S2 deletions <sup>c</sup> |
|-------------|-------------|------------------------------------------------------------------------------------------------------------------------|--------------------------------------------|----------------------------------------------------------------|
| 16          | 321,533     | 1. <b>wild-type (82.957)</b><br>2. <b>pre-S1 del (10.988)</b><br>3. pre-S2 del (4.178)<br>4. pre-S1+pre-S2 del (1.877) | negative                                   | low                                                            |
| 17          | 349,212     | 1. <b>wild-type (93.746)</b><br>2. <b>pre-S1 del (5.846)</b><br>3. pre-S2 del (0.398)<br>4. pre-S1+pre-S2 del (0.018)  | negative                                   | low                                                            |
| 18          | 344,222     | 1. <b>pre-S1 del (76.151)</b><br>2. <b>wild-type (19.034)</b><br>3. pre-S2 del (4.624)<br>4. pre-S1+pre-S2 del (0.192) | negative                                   | low                                                            |
| 19          | 314,062     | 1. <b>wild-type (94.701)</b><br>2. <b>pre-S1 del (5.086)</b><br>3. pre-S2 del (0.137)<br>4. pre-S1+pre-S2 del (0.077)  | negative                                   | low                                                            |
| 20          | 326,601     | 1. <b>wild-type (58.461)</b><br>2. <b>pre-S2 del (37.194)</b><br>3. pre-S1 del (2.939)<br>4. pre-S1+pre-S2 del (1.407) | positive                                   | high                                                           |

**Table S1. List of the pre-S genotyping result by NGS-based analysis in 40 HBV-related HCC patients (continued)**

| Patient No. | Total reads | Pre-S deletion type (%) <sup>a</sup>                                                                                   | Deletions spanning the pre-S2 gene segment | Percentage of pre-S2 plus pre-S1+pre-S2 deletions <sup>c</sup> |
|-------------|-------------|------------------------------------------------------------------------------------------------------------------------|--------------------------------------------|----------------------------------------------------------------|
| 21          | 339,776     | 1. <b>wild-type (59.263)</b><br>2. <b>pre-S2 del (37.934)</b><br>3. pre-S1 del (1.940)<br>4. pre-S1+pre-S2 del (0.862) | positive                                   | high                                                           |
| 22          | 352,523     | 1. <b>pre-S2 del (56.155)</b><br>2. <b>wild-type (42.610)</b><br>3. pre-S1+pre-S2 del (0.718)<br>4. pre-S1 del (0.516) | positive                                   | high                                                           |
| 23          | 343,602     | 1. <b>pre-S2 del (94.816)</b><br>2. <b>wild-type (5.049)</b><br>3. pre-S1+pre-S2 del (0.070)<br>4. pre-S1 del (0.066)  | positive                                   | high                                                           |
| 24          | 325,089     | 1. <b>wild-type (65.077)</b><br>2. <b>pre-S2 del (28.468)</b><br>3. pre-S1 del (4.516)<br>4. pre-S1+pre-S2 del (1.940) | positive                                   | high                                                           |
| 25          | 312,304     | 1. <b>wild-type (91.356)</b><br>2. <b>pre-S2 del (8.015)</b><br>3. pre-S1 del (0.379)<br>4. pre-S1+pre-S2 del (0.251)  | positive                                   | low                                                            |

**Table S1. List of the pre-S genotyping result by NGS-based analysis in 40 HBV-related HCC patients (continued)**

| <b>Patient No.</b> | <b>Total reads</b> | <b>Pre-S deletion type (%)<sup>a</sup></b>                                                                                             | <b>Deletions spanning the pre-S2 gene segment</b> | <b>Percentage of pre-S2 plus pre-S1+pre-S2 deletions<sup>c</sup></b> |
|--------------------|--------------------|----------------------------------------------------------------------------------------------------------------------------------------|---------------------------------------------------|----------------------------------------------------------------------|
| 26                 | 348,782            | 1. <b>wild-type (46.914)</b><br>2. <b>pre-S1 del (45.517)</b><br>3. <b>pre-S2 del (6.834)</b><br>4. pre-S1+pre-S2 del (0.735)          | positive                                          | low                                                                  |
| 27                 | 349,650            | 1. <b>pre-S1 del (76.228)</b><br>2. <b>wild-type (12.583)</b><br>3. <b>pre-S2 del (10.622)</b><br>4. pre-S1+pre-S2 del (0.567)         | positive                                          | low                                                                  |
| 28                 | 338,492            | 1. <b>pre-S1+pre-S2 del (46.237)</b><br>2. <b>pre-S2 del (26.927)</b><br>3. <b>pre-S1 del (14.368)</b><br>4. <b>wild-type (12.467)</b> | positive                                          | high                                                                 |
| 29                 | 322,281            | 1. <b>wild-type (69.001)</b><br>2. <b>pre-S1 del (20.530)</b><br>3. <b>pre-S2 del (9.463)</b><br>4. pre-S1+pre-S2 del (1.006)          | positive                                          | low                                                                  |
| 30                 | 367,627            | 1. <b>wild-type (50.938)</b><br>2. <b>pre-S1 del (19.760)</b><br>3. <b>pre-S1+pre-S2 del (15.021)</b><br>4. <b>pre-S2 del (14.280)</b> | positive                                          | high                                                                 |

**Table S1. List of the pre-S genotyping result by NGS-based analysis in 40 HBV-related HCC patients (continued)**

| <b>Patient No.</b> | <b>Total reads</b> | <b>Pre-S deletion type (%)<sup>a</sup></b>                                                                                            | <b>Deletions spanning the pre-S2 gene segment</b> | <b>Percentage of pre-S2 plus pre-S1+pre-S2 deletions<sup>c</sup></b> |
|--------------------|--------------------|---------------------------------------------------------------------------------------------------------------------------------------|---------------------------------------------------|----------------------------------------------------------------------|
| 31                 | 314,247            | 1. <b>wild-type (75.230)</b><br>2. <b>pre-S1+pre-S2 del (13.878)</b><br>3. <b>pre-S1 del (10.730)</b><br>4. pre-S2 del (0.162)        | positive                                          | low                                                                  |
| 32                 | 323,119            | 1. <b>pre-S2 del (41.477)</b><br>2. <b>pre-S1+pre-S2 del (39.126)</b><br>3. <b>wild-type (12.348)</b><br>4. <b>pre-S1 del (7.048)</b> | positive                                          | high                                                                 |
| 33                 | 345,498            | 1. <b>pre-S1+pre-S2 del (45.703)</b><br>2. <b>pre-S2 del (29.458)</b><br>3. <b>wild-type (14.926)</b><br>4. <b>pre-S1 del (9.913)</b> | positive                                          | high                                                                 |
| 34                 | 345,927            | 1. <b>wild-type (30.944)</b><br>2. <b>pre-S2 del (30.409)</b><br>3. <b>pre-S1+pre-S2 del (29.105)</b><br>4. <b>pre-S1 (9.542)</b>     | positive                                          | high                                                                 |
| 35                 | 330,111            | 1. <b>pre-S1 del (40.086)</b><br>2. <b>wild-type (34.919)</b><br>3. <b>pre-S2 del (16.065)</b><br>4. <b>pre-S1+pre-S2 del (8.930)</b> | positive                                          | high                                                                 |

**Table S1. List of the pre-S genotyping result by NGS-based analysis in 40 HBV-related HCC patients (continued)**

| <b>Patient No.</b> | <b>Total reads</b> | <b>Pre-S deletion type (%)<sup>a</sup></b>                                                                                             | <b>Deletions spanning the pre-S2 gene segment</b> | <b>Percentage of pre-S2 plus pre-S1+pre-S2 deletions<sup>c</sup></b> |
|--------------------|--------------------|----------------------------------------------------------------------------------------------------------------------------------------|---------------------------------------------------|----------------------------------------------------------------------|
| 36                 | 337,893            | 1. <b>pre-S1 del (29.181)</b><br>2. <b>wild-type (23.836)</b><br>3. <b>pre-S2 del (23.645)</b><br>4. <b>pre-S1+pre-S2 del (23.338)</b> | positive                                          | high                                                                 |
| 37                 | 319,570            | 1. <b>wild-type (30.973)</b><br>2. <b>pre-S1+pre-S2 del (27.774)</b><br>3. <b>pre-S1 del (27.161)</b><br>4. <b>pre-S2 del (14.091)</b> | positive                                          | high                                                                 |
| 38                 | 317,285            | 1. <b>pre-S1 del (43.130)</b><br>2. <b>wild-type (41.965)</b><br>3. <b>pre-S2 del (9.508)</b><br>4. <b>pre-S1+pre-S2 del (5.397)</b>   | positive                                          | low                                                                  |
| 39                 | 337,345            | 1. <b>wild-type (36.868)</b><br>2. <b>pre-S1 del (35.238)</b><br>3. <b>pre-S2 del (21.130)</b><br>4. <b>pre-S1+pre-S2 del (6.763)</b>  | positive                                          | high                                                                 |
| 40                 | 326,346            | 1. <b>wild-type (58.984)</b><br>2. <b>pre-S2 del (34.533)</b><br>3. <b>pre-S1+pre-S2 del (4.497)</b><br>4. <b>pre-S1 (1.986)</b>       | positive                                          | high                                                                 |



**Table S1. List of the pre-S genotyping result by NGS-based analysis in 40 HBV-related HCC patients (continued)**

<sup>a</sup>The total percentage of pre-S gene DNA in each type of pre-S deletion was shown in descending order.

<sup>b</sup>The pre-S deletion type above the cut-off percentage (5.049) was shown in bold.

<sup>c</sup>The percentage of pre-S2 plus pre-S1+pre-S2 deletions above 24.995 was defined as high percentage.

Abbreviations: NGS, next-generation sequencing; HBV, hepatitis B virus; HCC, hepatocellular carcinoma; del, deletion.
